# Supplementary material for: Associations between health systems capacity and mother-to-child HIV prevention program outcomes in Zambia
Source: PLoS One. 2018 Sep 7;13(9):e0202889. doi: 10.1371/journal.pone.0202889 (PMC6128540; doi:10.1371/journal.pone.0202889)
Supplement: S1 Dataset — (CSV) [file pone.0202889.s001.csv]

clinic	n	nat12mos	kpatsat	apatsat	hwmot	train	infra	equip	lab	drug	infx	fin	gov	ready	cclinobs	aclinobs	art12mo
1	37	30	.80000001	.75999999	.76521742	.5	.91666669	1	.5625	.80952382	.66666669	.5	.97058821	.84693879	.28260869	.40000001	64.900002
2	42	42	.80000001	.74000001	.76086962	1	.66666669	.69999999	1	.80952382	.66666669	.75	.83823532	.75	.77142859	1	92.900002
3	40	38	.83333331	.73000002	.64347827	.5	.54166669	.75	.89999998	.52631581	.55555558	.5	.7352941	.89795917	.85294122	.60000002	90
4	40	39	.83333331	.75	.73043478	.5	.70833331	.69999999	1	.85714293	.66666669	.75	.92647058	.69999999	1	.80000001	97.5
5	40	32	.76666671	.75	.76086962	1	.79166669	.94999999	.625	.85714293	.625	.75	.80882353	.86000001	.83749998	.80000001	75
6	39	34	.60000002	.81	.66086948	1	.75	.80000001	.8125	.61904758	.77777779	.5	.82352942	.65306121	.625	0	84.599998
7	14	13	.71666658	.72000003	.62608701	1	.79166669	.89999998	.875	.75	.77777779	.5	.66176468	.77083331	.78205132	0	71.400002
8	41	27	.51666671	.63999999	.73478258	1	.83333331	.85000002	1	.69999999	.77777779	1	.72058821	.77551019	.1967742	.60000002	65.900002
9	21	18	.78333342	.76999998	.69565219	1	.83333331	1	.6875	.85714293	.83333331	.66666669	.88235289	.77999997	.61428571	.80000001	81
10	23	23	.76666671	.83999997	.6695652	1	.79166669	.94999999	.625	.66666669	.77777779	.5	.94117647	.83673471	.7638889	.2	100
11	22	21	.85000002	.69999999	.68695652	1	.83333331	.69999999	.375	.47619051	.72222221	.5	.7647059	.67346942	.57575762	0	86.400002
12	18	16	.73333329	.76999998	.7478261	1	.91666669	.64999998	.8125	.71428567	.83333331	.5	.66176468	.95999998	.90909088	0	88.900002
13	40	38	.64999998	.69999999	.78260869	0	.75	1	.8125	.80952382	.72222221	.5	.63235289	.72448981	.8225807	.40000001	92.5
14	21	20	.85000002	.85000002	.6695652	1	.75	.60000002	.66666669	.66666669	.83333331	.5	.80882353	.72000003	.83333337	.40000001	95.199997
15	18	10	.60000002	.73000002	.70434779	1	.375	.69999999	.375	1	.66666669	.33333331	.70588237	.59574473	.53611112	.40000001	55.599998
16	38	36	.85000002	.80000001	.70434779	1	.66666669	1	.8125	.71428567	.83333331	.5	.95588237	.79591829	.60000002	.40000001	89.5
17	17	12	.66666669	.73000002	.73043478	1	.58333331	.60000002	.6875	.71428567	.77777779	.75	.82352942	.60869563	.765625	0	64.699997
18	26	23	.71666658	.73000002	.66086948	0	.83333331	.89999998	.8125	.95238101	.55555558	.5	.92647058	.80000001	.71176469	0	84.599998
19	28	19	.71666658	.75	.72173911	1	.91666669	.80000001	.5625	.85714293	.77777779	.66666669	.91176468	1	.94827592	.60000002	67.900002
20	13	9	.75	.77999997	.72608697	1	.79166669	.69999999	.8125	.94999999	.55555558	.66666669	.70588237	.65625	.71212119	.40000001	69.199997
21	21	17	.68333328	.77999997	.81739128	1	.875	.94999999	.8125	.80952382	.33333331	.5	.80882353	.73000002	.5916667	1	76.199997
22	40	30	.75	.73000002	.7521739	.5	.83333331	.69999999	.8125	.95238101	.66666669	.33333331	.77941179	.71875	.78157902	.2	70
23	40	32	.75	.75	.74347818	.5	.75	.69999999	.5	.89999998	.55555558	.33333331	.85294122	.63829792	.9852941	1	80
24	20	17	.78333342	.58999997	.79130429	1	.83333331	.55000001	.8125	.90476191	.77777779	.66666669	.94117647	.73000002	1	0	85
25	40	35	.73333329	.76999998	.81304348	0	.83333331	1	.625	.85714293	.77777779	.75	.82352942	.88	.61290318	.80000001	87.5
26	25	17	.76666671	.77999997	.79130429	1	.75	.60000002	.6875	.80952382	.55555558	.5	.94117647	.72340423	.939394	.40000001	68
27	13	11	.4666667	.73000002	.67826092	1	.75	.5	.375	.30000001	.6111111	.75	.89705878	.66666669	.15000001	.2	84.599998
28	13	8	.58333331	.70999998	.78260869	1	.75	.30000001	.8125	.66666669	.66666669	.5	.7352941	.75999999	.84090912	0	61.5
29	14	10	.78333342	.79000002	.71304351	1	.45833331	.80000001	.85714293	.76190478	.72222221	.5	.72058821	.78723413	.41666669	.60000002	71.400002
